# Supplementary material
Source: MDPI journal article supplement (https://www.mdpi.com/2073-4395/9/9/483)
Supplement: s1 [file s1]

## Supplementary material

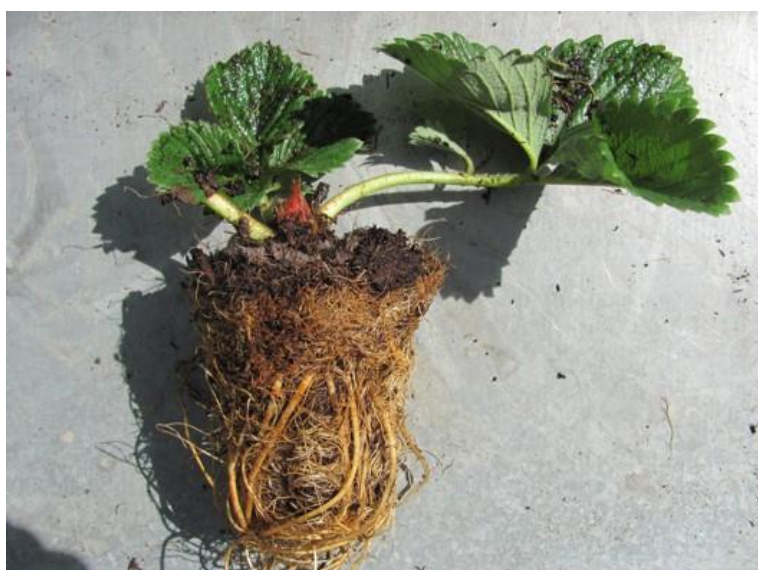

Figure S1. Cold stored strawberry plants before transplantation (0 DAT)

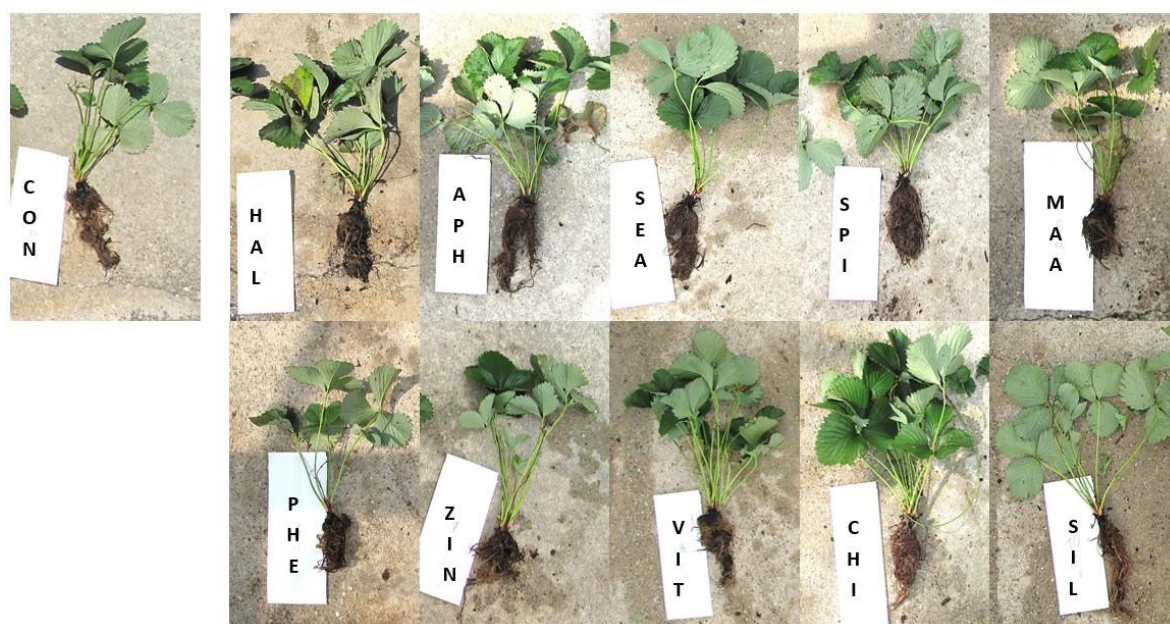

Figure S2. Strawberry plant at the end of the experiment (90 DAT) as affected by the application of the different biostimulants. Treatments legend: CON, control; HAL, humic acids; APH, alfalfa protein hydrolysate; SEA, macroseaweed extract; SPI, microalga hydrolysate; MAA, mix of amino acids; PHE, MAA combined with pure phenylalanine; ZIN, MAA combined with zinc; VIT, B-group vitamins; CHI, chitosan; SIL, Siliforce®.
